# Supplementary material for: Time to full enteral feeds in hospitalised preterm and very low birth weight infants in Nigeria and Kenya
Source: PubMed Central journal article supplement (PMC10923414; doi:10.1371/journal.pone.0277847), 2024-03-08
Supplement: pone.0277847.s003.pdf [file pone.0277847.s003.pdf]

**S1 Table: Characteristics of Preterm and VLBW Infants**

|                              | <b>NNU1<br/>13<br/>(2.6)</b> | <b>NNU2<br/>104<br/>(21.5)</b> | <b>NNU3<br/>58<br/>(12.0)</b> | <b>NNU4<br/>92<br/>(19)</b> | <b>NNU5<br/>66<br/>(13.6)</b> | <b>NNU6<br/>128<br/>(26.4)</b> | <b>NNU7<br/>23<br/>(4.8)</b> | <b>Total<br/>484<br/>(100)</b> |
|------------------------------|------------------------------|--------------------------------|-------------------------------|-----------------------------|-------------------------------|--------------------------------|------------------------------|--------------------------------|
| Male                         | 8<br>(61.5)                  | 52<br>(50.0)                   | 26<br>(44.8)                  | 45<br>(48.9)                | 32<br>(48.5)                  | 52<br>(40.6)                   | 11<br>(47.8)                 | 226<br>(46.7)                  |
| Birthweight (kg)**           | 1.4<br>(1.2,1.4)             | 1.2<br>(1.0,1.3)               | 1.2<br>(0.9,1.3)              | 1.2<br>(1.0,1.4)            | 1.1<br>(1.0,1.2)              | 1.1<br>(1.0,1.3)               | 1.2<br>(1.0,1.4)             | 1.2<br>(1.1,1.3)               |
| GA**                         | 31<br>(30,32)                | 29<br>(28,31)                  | 30<br>(28,32)                 | 30<br>(27,32)               | 29<br>(28,30)                 | 29<br>(27,31)                  | 32<br>(31,33)                | 30<br>(28,32)                  |
| Birthweight <sup>††</sup> :  |                              |                                |                               |                             |                               |                                |                              |                                |
| • 1000 – 1499g               | 11<br>(84.6)                 | 77<br>(74)                     | 41<br>(70.7)                  | 71<br>(77.2)                | 50<br>(75.8)                  | 94<br>(73.4)                   | 19<br>(82.6)                 | 363<br>(78)                    |
| • < 1000g                    | 0<br>(0)                     | 17<br>(16.3)                   | 15<br>(25.9)                  | 20<br>(21.7)                | 16<br>(24.2)                  | 34<br>(26.6)                   | 3<br>(13.0)                  | 105<br>(22)                    |
| GA:                          |                              |                                |                               |                             |                               |                                |                              |                                |
| • 32 - <37wks                | 5<br>(38.5)                  | 19<br>(18.3)                   | 19<br>(32.8)                  | 27<br>(29.3)                | 13<br>(19.7)                  | 24<br>(18.8)                   | 14<br>(60.9)                 | 121<br>(25.0)                  |
| • 28 - <32wks                | 8<br>(61.5)                  | 63<br>(60.6)                   | 26<br>(44.8)                  | 39<br>(42.4)                | 40<br>(60.6)                  | 64<br>(50.0)                   | 9<br>(39.1)                  | 249<br>(51.4)                  |
| • < 28wks                    | 0<br>(0)                     | 22<br>(21.2)                   | 13<br>(22.4)                  | 26<br>(28.3)                | 13<br>(19.7)                  | 40<br>(31.3)                   | 0<br>(0)                     | 114<br>(23.6)                  |
| Birthweight <sup>†</sup> :   |                              |                                |                               |                             |                               |                                |                              |                                |
| • <10 <sup>th</sup> Centile  | 1<br>(9.1)                   | 18<br>(19.4)                   | 11<br>(40.7)                  | 25<br>(29.4)                | 22<br>(33.8)                  | 34<br>(26.6)                   | 14<br>(63.6)                 | 125<br>(29.0)                  |
| Birth Length <sup>††</sup> : |                              |                                |                               |                             |                               |                                |                              |                                |
| • <3 <sup>rd</sup> Centile   | 0<br>(0)                     | 20<br>(19.4)                   | 7<br>(25.9)                   | 18<br>(35.3)                | 10<br>(16.4)                  | 9<br>(7.0)                     | 12<br>(52.2)                 | 76<br>(19.0)                   |
| Weight/Length Ratio:         |                              |                                |                               |                             |                               |                                |                              |                                |
| • <3 <sup>rd</sup> Centile   | 0<br>(0)                     | 16<br>(15.5)                   | 4<br>(14.8)                   | 13<br>(25.5)                | 8<br>(13.1)                   | 12<br>(9.4)                    | 8<br>(34.8)                  | 61<br>(15.2)                   |
| OFC:                         |                              |                                |                               |                             |                               |                                |                              |                                |
| • <3 <sup>rd</sup> Centile   | 0<br>(0)                     | 7<br>(6.9)                     | 6<br>(22.2)                   | 10<br>(18.9)                | 6<br>(9.8)                    | 2<br>(1.6)                     | 7<br>(31.8)                  | 38<br>(9.4)                    |

VLBW = very low birth weight; GA = gestational age; OFC=occipito-frontal circumference

Data are number (%) or \*\*median (IQR); † 53 missing birthweights; †† 85 missing birth lengths; 81 missing OFC.
