# Supplementary material for: Time to full enteral feeds in hospitalised preterm and very low birth weight infants in Nigeria and Kenya
Source: PubMed Central journal article supplement (PMC10923414; doi:10.1371/journal.pone.0277847), 2024-03-08
Supplement: pone.0277847.s004.pdf [file pone.0277847.s004.pdf]

**S2 Table: Congenital Abnormalities**

| Congenital Abnormalities                                                      | Frequency        |
|-------------------------------------------------------------------------------|------------------|
| Acyanotic Congenital Heart Disease                                            | 3                |
| Hydrocephalus                                                                 | 2                |
| Down Syndrome                                                                 | 2                |
| Microcephaly                                                                  | 1                |
| Duodenal atresia + Atrioventricular Cushion Defect + Patent Ductus Arteriosus | 1                |
| Oesophageal Atresia + Tracheo-oesophageal fistula                             | 1                |
| Gastroschisis                                                                 | 1                |
| Jejunal Atresia                                                               | 1                |
| Congenital amputation of the right foot                                       | 1                |
| Genu recurvatum                                                               | 1                |
| <b>Total</b>                                                                  | <b>14 (2.8%)</b> |
